# Supplementary material for: Disease Prevention: An Opportunity to Expand Edible Plant-Based Vaccines?
Source: PubMed Central journal article supplement (PMC5492011; doi:10.3390/vaccines5020014), 2017-05-30
Supplement: vaccines-05-00014-s001.pdf [file vaccines-05-00014-s001.pdf]

**Table S1.** Onset of outbreak of infectious diseases around the world over the last six years (until September 2016), according to the World Health Organization (WHO) [14–17]. Data are presented by continent, country, disease, and year of the outbreak.

| Continent   | Country (or Geographical Region)           | Disease and/or Epidemiological AGENT                                  | Month and Year that the Outbreak Occurs        |
|-------------|--------------------------------------------|-----------------------------------------------------------------------|------------------------------------------------|
| Africa      | Central Africa                             | Cholera                                                               | October 2010                                   |
|             |                                            | Poliomielitis                                                         | June 2014                                      |
|             |                                            | Monkeypox                                                             | October 2016                                   |
|             | West Africa                                | Ebola virus                                                           | April, May, June, July, August, September 2014 |
|             | Angola                                     | Poliomielitis                                                         | July, September, 2010                          |
|             |                                            | Yellow fever                                                          | February, March, April, June 2016              |
|             | Benin                                      | Lassa fever                                                           | February, June 2016                            |
|             | Burkina Faso                               | Dengue Fever                                                          | November 2016                                  |
|             | Cabo Verde                                 | Zika virus                                                            | December 2015                                  |
|             | Cameroon                                   | Yellow fever                                                          | February and May 2010                          |
|             |                                            |                                                                       | February 2012                                  |
|             |                                            |                                                                       | October 2013                                   |
|             |                                            | Wild Poliovirus                                                       | November 2013                                  |
|             |                                            | Poliomielitis                                                         | March 2014                                     |
|             | Ivory Coast                                | Yellow fever                                                          | January 2010.                                  |
|             |                                            |                                                                       | January 2011.                                  |
|             | Horn of Africa                             | Wild Poliovirus                                                       | May, October, 2013                             |
|             | Chad                                       | Meningococcal disease, <i>Neisseria meningitidis</i> infectious agent | April 2010                                     |
|             |                                            |                                                                       | March 2011                                     |
|             |                                            | Poliomielitis                                                         | June 2011                                      |
|             |                                            | Yellow fever                                                          | February 2013                                  |
|             | Egypt                                      | Dengue                                                                | November 2015                                  |
|             | Guinea                                     | Yellow fever                                                          | January 2010                                   |
|             |                                            | Ebola hemorrhagic fever                                               | March 2014                                     |
|             | Ghana                                      | Yellow fever                                                          | February 2012                                  |
|             | Kenya                                      | Chikungunya                                                           | August 2016                                    |
|             | Liberia                                    | Ebola hemorrhagic fever                                               | March 2014                                     |
| Lassa fever |                                            | May 2016                                                              |                                                |
| Madagascar  | Poliovirus                                 | July 2015                                                             |                                                |
|             | Plague (bubonic, pneumonic and septicemic) | September 2015                                                        |                                                |
| Mali        | Ebola virus                                | October 2014                                                          |                                                |
| Mauritania  | Rift Valley fever                          | November 2012                                                         |                                                |

|                            |                              |                                 |                                   |
|----------------------------|------------------------------|---------------------------------|-----------------------------------|
|                            | Nigeria                      | Lassa fever                     | April 2012                        |
|                            |                              |                                 | January, May 2016                 |
|                            |                              | Meningococcal disease           | March 2015                        |
|                            |                              | Rift Valley fever               | September, November 2016          |
|                            | Democratic Republic of Congo | Yellow fever                    | July 2010                         |
|                            |                              |                                 | December 2012                     |
|                            |                              |                                 | April, June 2016                  |
|                            |                              | Poliomyelitis                   | September, November 2010          |
|                            |                              | Cholera                         | July 2011                         |
|                            |                              |                                 | July 2012                         |
|                            |                              |                                 | December 2015                     |
|                            | Ebola hemorrhagic fever      | August, September, October 2012 |                                   |
|                            | Senegal                      | Yellow fever                    | October 2010                      |
|                            |                              |                                 | December 2011                     |
|                            |                              | Ebola virus                     | August 2014                       |
|                            |                              | Chikungunya                     | September 2015                    |
|                            | Sierra Leone                 | Yellow fever                    | March 2011                        |
|                            |                              | Cholera                         | August, September, October 2012   |
|                            |                              | Ebola virus                     | June 2015                         |
|                            | South Africa                 | Rift Valley fever               | May 2010                          |
|                            | Sudan                        | Yellow fever                    | November, December 2012           |
|                            |                              |                                 | December 2013                     |
|                            | South Sudan                  | Hemorrhagic fever syndrome      | May 2016                          |
|                            | United Republic of Tanzania  | Cholera                         | September, October, November 2015 |
|                            | Togo                         | Lassa fever                     | March 2016                        |
|                            | Uganda                       | Yellow fever                    | January 2011                      |
| April 2016                 |                              |                                 |                                   |
| Ebola hemorrhagic fever    |                              | May 2011                        |                                   |
|                            |                              | July, August, November 2012     |                                   |
| Marburg haemorrhagic fever |                              | October, November 2012          |                                   |
|                            |                              | October 2014                    |                                   |
| Typhoid fever              | March 2015                   |                                 |                                   |
| America                    | Argentina                    | Zika virus                      | March 2016                        |
|                            |                              | Chikungunya                     | March 2016                        |
|                            | Barbados                     | Zika virus                      | January 2016                      |
|                            | Bolivia                      | Zika virus                      | January 2016                      |
|                            | Brazil                       | Poliovirus in sewage            | June 2014                         |

|                          |                                            |                                              |
|--------------------------|--------------------------------------------|----------------------------------------------|
|                          | West Nile Virus                            | November 2014                                |
|                          | Zika virus                                 | October 2015                                 |
|                          | Microcephaly                               | November, December 2015                      |
|                          |                                            | January 2016                                 |
|                          | Guillain-Barré syndrome                    | February 2016                                |
| Colombia                 | Zika virus                                 | October 2015                                 |
|                          | Guillain-Barré syndrome                    | February 2016                                |
| Cuba                     | Zika virus                                 | March 2016                                   |
| Chile                    | Measles                                    | March, April, June, 2011                     |
|                          |                                            | May, June 2015                               |
|                          | Zika virus                                 | April 2016                                   |
| Ecuador                  | Zika virus                                 | January 2016                                 |
| El Salvador              | Zika virus                                 | November 2015                                |
|                          | Guillain-Barré syndrome                    | January 2016                                 |
| United States of America | Hantavirus pulmonary syndrome              | September 2012                               |
|                          | Enterovirus D68                            | September 2014                               |
|                          | Ebola virus                                | October 2014                                 |
|                          | Measles                                    | January, August 2013                         |
|                          |                                            | December 2014                                |
|                          |                                            | January, most wanted, March, April, May 2015 |
|                          | Lassa fever                                | May 2015                                     |
|                          | Microcephaly                               | February 2016                                |
|                          | Zika virus                                 | February 2016                                |
|                          | Guillain-Barré syndrome                    | March 2016                                   |
|                          | Elizabethkingia                            | April 2016                                   |
|                          | Chikungunya                                | June 2016                                    |
| Guatemala                | Zika virus                                 | November 2015                                |
| French Guiana            | Zika virus                                 | January 2016                                 |
| Haiti                    | Cholera                                    | October, November 2010                       |
|                          | Zika virus                                 | January 2016                                 |
| Honduras                 | Zika virus                                 | December 2015                                |
| Mexico                   | Cholera                                    | October, November 2013                       |
|                          | Zika virus                                 | December 2015                                |
| Panama                   | Zika virus                                 | December 2015                                |
|                          | Microcephaly                               | March 2016                                   |
|                          | Guillain-Barré syndrome                    | March 2016                                   |
| Paraguay                 | Zika virus                                 | December 2015                                |
| Peru                     | Plague (bubonic, pneumonic and septicemic) | August 2010                                  |

|                                                            |                                |                                                         |                                                                                    |
|------------------------------------------------------------|--------------------------------|---------------------------------------------------------|------------------------------------------------------------------------------------|
|                                                            |                                | Zika virus                                              | April 2016                                                                         |
|                                                            |                                | Oropouche virus disease                                 | June 2016                                                                          |
|                                                            | Puerto Rico                    | Zika virus                                              | January 2016                                                                       |
|                                                            | Dominican Republic             | Zika virus                                              | January 2016                                                                       |
|                                                            | Saint Lucia                    | Zika virus                                              | April 2016                                                                         |
|                                                            | Surinam                        | Zika virus                                              | November 2015                                                                      |
|                                                            | Trinidad and Tobago            | Zika virus                                              | February 2016                                                                      |
|                                                            | Uruguay                        | Dengue                                                  | March 2016                                                                         |
|                                                            | Venezuela                      | Zika virus                                              | December 2015                                                                      |
|                                                            |                                | Guillain-Barré syndrome                                 | February 2016                                                                      |
| Asia                                                       | Saudi Arabia                   | Middle East respiratory syndrome coronavirus (MERS-CoV) | May, June, July, August, September, October, November, December 2013               |
|                                                            |                                |                                                         | January, February, March, April, May, June, July, October, November, December 2014 |
|                                                            |                                |                                                         | May, June, July, August, September, October, November, December 2015               |
|                                                            |                                |                                                         | January, February, March, May, June, July, September, October, November 2016       |
|                                                            | Central Asia                   | Poliomyelitis                                           | November 2010                                                                      |
|                                                            | Bangladesh                     | Avian influenza, H5N1 virus infectious agent            | March 2011                                                                         |
|                                                            |                                |                                                         | March 2012                                                                         |
|                                                            | Cambodia                       | Avian influenza, H5N1 virus infectious agent            | February, April, August 2011                                                       |
|                                                            |                                |                                                         | January, April, May 2012                                                           |
|                                                            |                                |                                                         | February 2013                                                                      |
|                                                            | China                          | Avian influenza, H5N1 virus infectious agent            | May, November 2010                                                                 |
|                                                            |                                |                                                         | January, June 2012                                                                 |
|                                                            |                                |                                                         | January 2014                                                                       |
|                                                            |                                | Wild poliovirus                                         | September 2011                                                                     |
|                                                            |                                | Avian influenza, H7N9 virus infectious agent            | April, May, July, August, October, November, December 2013                         |
|                                                            |                                |                                                         | January, February, March, April, May, June, September, October, December 2014      |
| March, June, July, October, November, December 2015        |                                |                                                         |                                                                                    |
| January, February, March, May, July, August, November 2016 |                                |                                                         |                                                                                    |
| Avian influenza, H5N6 virus infectious agent               |                                | December 2014                                           |                                                                                    |
|                                                            | July 2015                      |                                                         |                                                                                    |
|                                                            | January, March, May, June 2016 |                                                         |                                                                                    |
| Measles                                                    | Throughout 2014                |                                                         |                                                                                    |

|                      |                                                                        |                                                 |
|----------------------|------------------------------------------------------------------------|-------------------------------------------------|
|                      |                                                                        | January, February, March, April 2015            |
|                      | Rubella                                                                | May, June, July, August, October, November 2014 |
|                      |                                                                        | January, March 2015                             |
|                      | Middle East respiratory syndrome coronavirus (MERS-CoV)                | May 2015                                        |
|                      | Yellow fever                                                           | April 2016                                      |
|                      | Rift Valley fever                                                      | August 2016                                     |
| United Arab Emirates | Middle East respiratory syndrome coronavirus (MERS-CoV)                | May, June 2015                                  |
|                      |                                                                        | January 2016                                    |
| The Philippines      | Measles                                                                | Throughout 2014                                 |
|                      |                                                                        | January, February, March 2015                   |
|                      | Middle East respiratory syndrome coronavirus (MERS-CoV)                | July 2015                                       |
| Indonesia            | Avian influenza, H5N1 virus infectious agent                           | February, July, August, October, December, 2010 |
|                      |                                                                        | March, April, May, June, October, November 2011 |
|                      |                                                                        | January, February, March, April, July, 2012     |
| Iraq                 | Cholera                                                                | September, October, November 2015               |
| Iran                 | Middle East respiratory syndrome coronavirus (MERS-CoV)                | May 2015                                        |
| Israel               | Poliovirus                                                             | August, September 2013                          |
| Japan                | Measles                                                                | Throughout 2014                                 |
|                      |                                                                        | January, February, March, April 2015            |
| Jordan               | Middle East respiratory syndrome coronavirus (MERS-CoV)                | September, October 2015                         |
| Kuwait               | Middle East respiratory syndrome coronavirus (MERS-CoV)                | September 2015                                  |
| Kyrgyzstan           | Measles                                                                | January 2015                                    |
| Malaysia             | Measles                                                                | Throughout 2014                                 |
|                      |                                                                        | January, February, March, April 2015            |
| Maldives             | Zika virus                                                             | January 2016                                    |
| Mongolia             | Measles                                                                | March, April 2015                               |
| Oman                 | Middle East respiratory syndrome coronavirus (MERS-CoV)                | June 2015                                       |
|                      |                                                                        | January 2016                                    |
| Pakistan             | Crimean–Congo hemorrhagic fever                                        | October 2010                                    |
|                      | Dengue                                                                 | October 2010                                    |
|                      | Cholera                                                                | October 2010                                    |
|                      | The international spread of wild poliovirus from Pakistan is confirmed | September 2011                                  |
| Qatar                | Middle East respiratory syndrome coronavirus (MERS-CoV)                | October 2014                                    |
|                      |                                                                        | May 2015                                        |

|        |                                  |                                                                 |                                                         |
|--------|----------------------------------|-----------------------------------------------------------------|---------------------------------------------------------|
|        |                                  |                                                                 | March, May, June 2016                                   |
|        | Republic of Korea                | Middle East respiratory syndrome coronavirus (MERS-CoV)         | May, June, July, October, November 2015                 |
|        |                                  | Measles                                                         | April, May, June, July, August, September, October 2014 |
|        |                                  |                                                                 | March 2015                                              |
|        | Myanmar                          | Poliovirus                                                      | December 2015                                           |
|        | Lao People's Democratic Republic | Poliovirus                                                      | November, December 2015                                 |
|        |                                  |                                                                 | January 2016                                            |
|        | Russia                           | Poliomyelitis                                                   | November 2010                                           |
|        | Singapore                        | Measles                                                         | April, May, June, July, August, October, December 2014  |
|        |                                  |                                                                 | January, February 2015                                  |
|        | Syria                            | Poliomyelitis                                                   | October, November 2013                                  |
|        |                                  |                                                                 | March 2014 (worldwide spread)                           |
|        | Thailand                         | Middle East respiratory syndrome coronavirus (MERS-CoV)         | June, July 2015                                         |
|        |                                  |                                                                 | January, August 2016                                    |
|        | Tajikistan                       | Poliomyelitis                                                   | April 2010                                              |
|        | Vietnam                          | Avian influenza, H5N1 virus infectious agent                    | March, April 2010                                       |
|        |                                  |                                                                 | January, February, March 2012                           |
|        |                                  | Measles                                                         | Throughout 2014                                         |
|        |                                  |                                                                 | January, February, March 2015                           |
|        |                                  | Zika virus                                                      | April 2016                                              |
| Europe | Austria                          | Middle East respiratory syndrome coronavirus (MERS-CoV)         | September 2016                                          |
|        | Germany                          | Hemolytic uremic syndrome outbreak                              | May, June 2011                                          |
|        |                                  | Middle East respiratory syndrome coronavirus (MERS-CoV)         | March 2015                                              |
|        |                                  | Lassa fever                                                     | March 2016                                              |
|        | Europe                           | West Nile virus (WNV)                                           | August 2011                                             |
|        |                                  | Measles                                                         | March 2015                                              |
|        | Spain                            | Ebola virus                                                     | October 2014                                            |
|        |                                  | Measles                                                         | November 2010                                           |
|        |                                  |                                                                 | January, August 2011                                    |
|        |                                  |                                                                 | June, July 2013                                         |
|        |                                  |                                                                 | January, February, March, July 2014                     |
|        |                                  | Diphtheria, infectious agent <i>Corynebacterium diphtheriae</i> | May, June 2015                                          |
|        | Chikungunya                      | August, September 2015                                          |                                                         |
| France | Measles                          | January, February, March, April 2011                            |                                                         |
|        | Chikungunya                      | October 2014                                                    |                                                         |
|        | Zika virus                       | March 2016                                                      |                                                         |

|                               |                                                         |                                             |                                                        |
|-------------------------------|---------------------------------------------------------|---------------------------------------------|--------------------------------------------------------|
|                               | Portugal                                                | Dengue                                      | October 2012                                           |
|                               |                                                         | West Nile Virus                             | September 2015                                         |
|                               | United Kingdom                                          | A new coronavirus infection                 | September, October, November 2012                      |
|                               |                                                         |                                             | February, March, May, 2013                             |
|                               |                                                         | Ebola virus disease                         | December 2014                                          |
|                               |                                                         | Enterohaemorrhagic <i>Escherischia coli</i> | July 2016                                              |
|                               | Sweden                                                  | Lassa fever                                 | April 2016                                             |
| Turkey                        | Middle East respiratory syndrome coronavirus (MERS-CoV) | October 2014                                |                                                        |
| Oceania                       | Australia                                               | Measles                                     | Throughout 2014                                        |
|                               |                                                         |                                             | January, February, March, April 2015                   |
|                               | New Zealand                                             | Measles                                     | April, May, June, July, August, October, November 2014 |
|                               |                                                         |                                             | February 2015                                          |
|                               |                                                         | Rubella                                     | June 2014                                              |
|                               | Papua New Guinea                                        | Measles                                     | Throughout 2014                                        |
| January, February, March 2015 |                                                         |                                             |                                                        |
|                               | Zika virus                                              | April 2016                                  |                                                        |
